# Supplementary material for: Skin Wound Healing Rate in Fish Depends on Species and Microbiota
Source: MDPI journal article supplement (doi:10.3390/ijms22157804), 2021-07-21
Supplement: s1 [file s1]

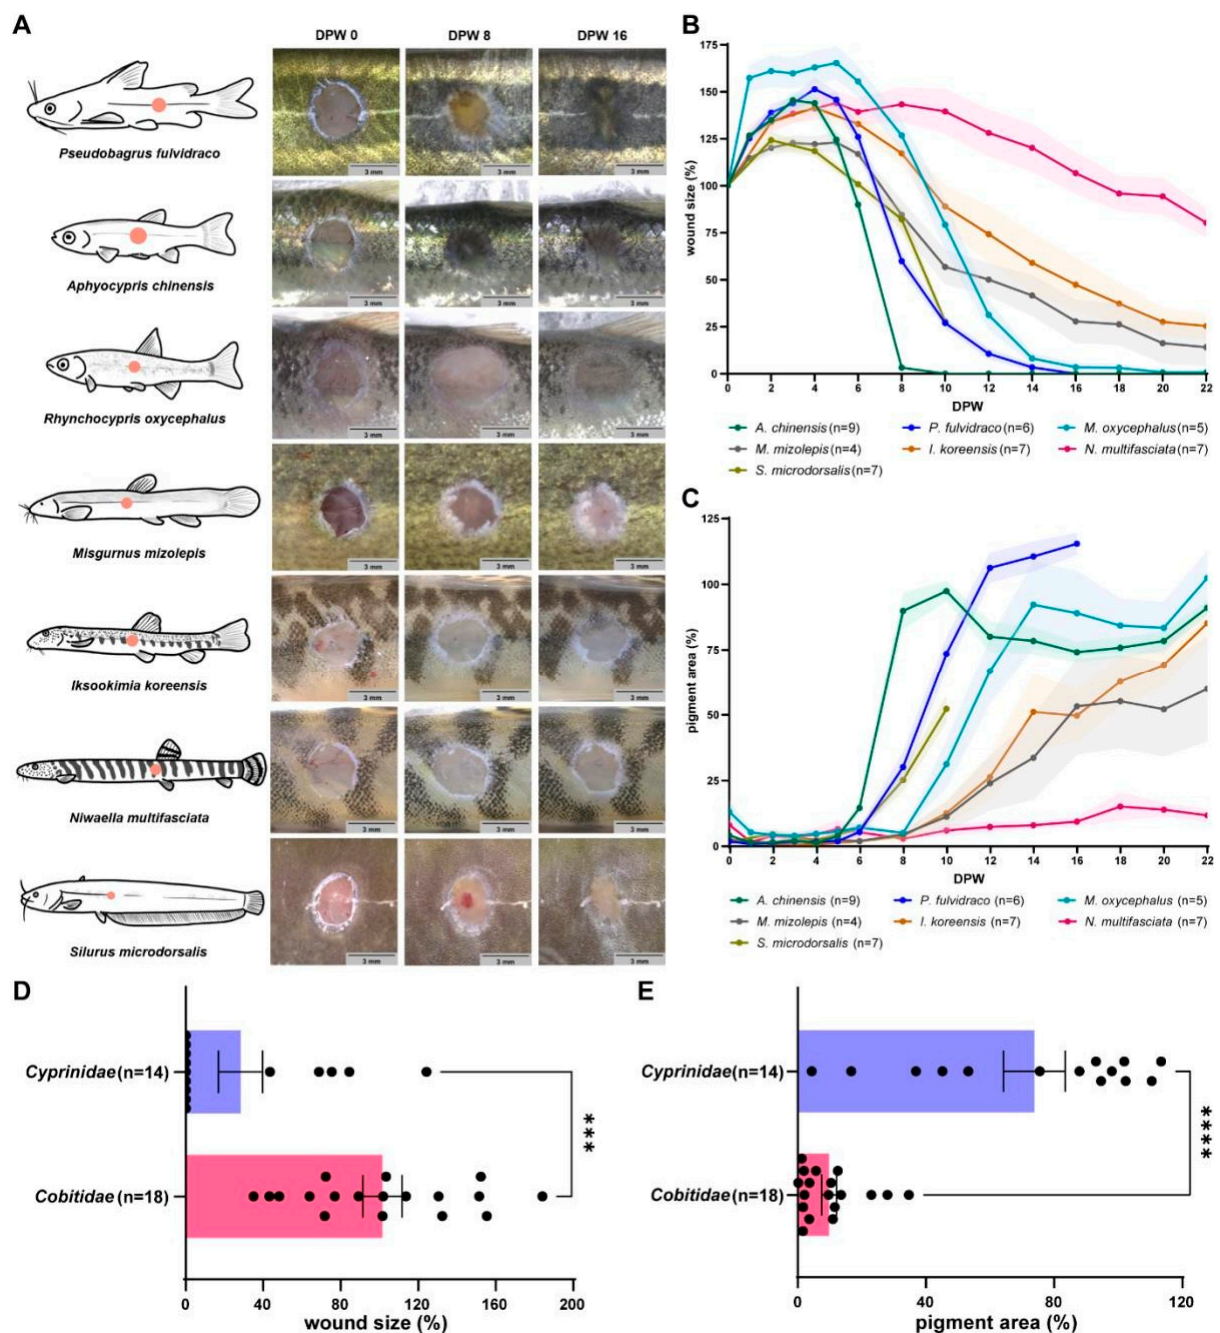

**Figure S1. Wound healing rate of diverse fish species.**

(A) Representative images of wounds. Wound images from 7 fish species at 0, 8, and 16 dpw.

Scale bars: 3 mm. (B, C) Changes in wound size percent (B) and pigment percent (C).

Wound size (pigment) percent: (wound size (pigment) at (n) dpw/0 dpw)\*100. (D, E)

Quantification of wound healing rate based on changes in wound size (D) and pigment (E).

Wound healing rates between the families Cyprinidae and Cobitidae were compared by

wound size (pigment) percent at 10 dpw. Sample size (n) is denoted next to the graph. \*\*\* p

$\leq 0.001$ , \*\*\*\*  $p \leq 0.0001$ .

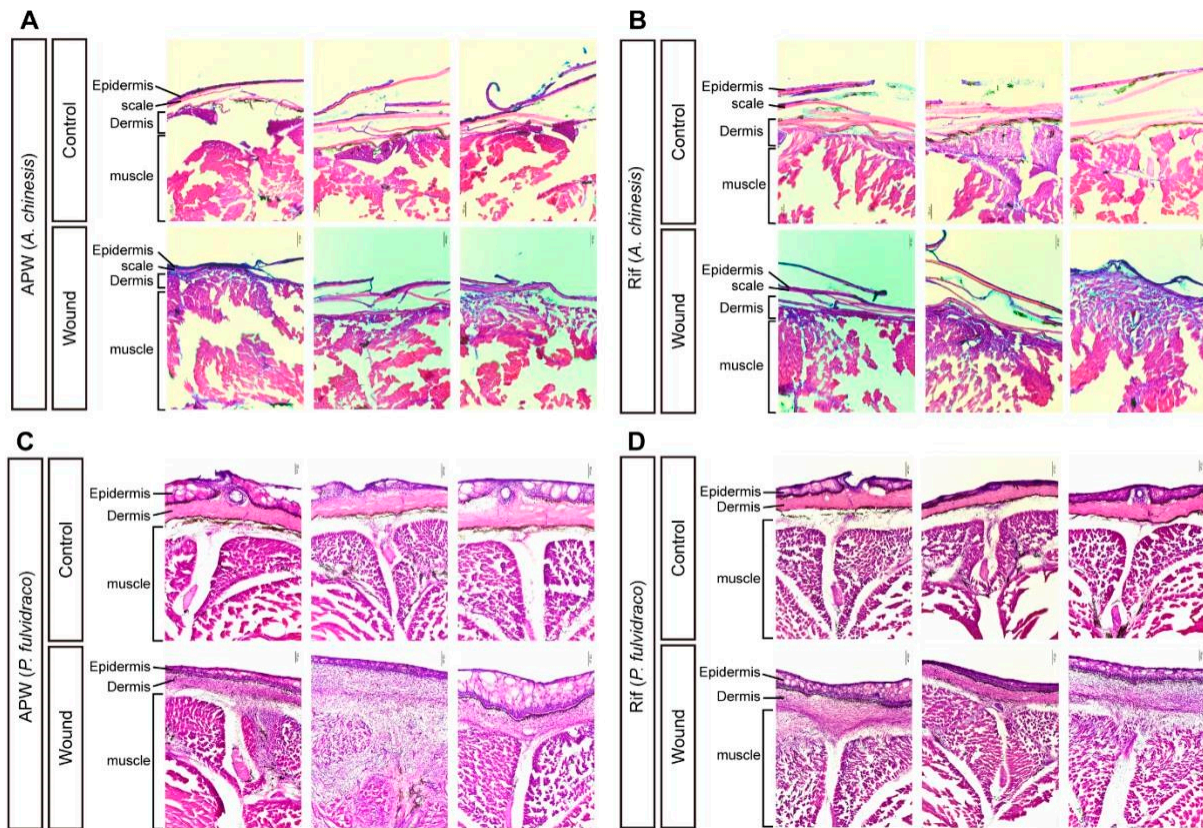

**Figure S2. Skin organization after wound healing.**

(A~D) H&E staining images showing transverse sections through the recovered wound tissue of Korean bullhead and Chinese bleak at 16 dpw. Representative images of 3 samples from each condition are shown here. (A, B) H&E staining on control side (top) and wounded side (bottom) of Chinese bleak reared in APW (A) and APW with rifampicin (B). (C, D) H&E staining on control side (top) and wounded side (bottom) of Korean bullhead reared in APW (C) and APW with rifampicin (D). Scale bars: 100  $\mu\text{m}$ .

A

| <i>Aphyocypris chinensis</i> APW                                        | %      | <i>Aphyocypris chinensis</i> Rif                                        | %      |
|-------------------------------------------------------------------------|--------|-------------------------------------------------------------------------|--------|
| <i>Muribaculaceae</i> (Bacteroidia)                                     | 20.92  | <i>Muribaculaceae</i> (Bacteroidia)                                     | 18.50  |
| <i>Muribaculaceae*</i> (Bacteroidia)                                    | 11.71  | <i>Lactobacillus</i> (Bacilli)                                          | 11.12  |
| <i>Lactobacillus</i> (Bacilli)                                          | 11.38  | <i>Muribaculaceae*</i> (Bacteroidia)                                    | 10.28  |
| <i>Muribaculum</i> (Bacteroidia)                                        | 10.74  | <i>Muribaculum</i> (Bacteroidia)                                        | 9.35   |
| <i>Lachnospiraceae*</i> (Clostridia)                                    | 9.71   | <i>Lachnospiraceae*</i> (Clostridia)                                    | 7.81   |
| <i>Campylobacter</i> (Campylobacteria)                                  | 5.73   | <i>Campylobacter</i> (Campylobacteria)                                  | 4.55   |
| <i>Bacteroides</i> (Bacteroidia)                                        | 3.08   | <i>Bacteroides</i> (Bacteroidia)                                        | 3.41   |
| <i>Bacteroidales**</i> (Bacteroidia)                                    | 2.27   | unclassified (Gammaproteobacteria)                                      | 2.96   |
| <i>Oscillospiraceae*</i> (Clostridia)                                   | 2.17   | <i>Akkermansia</i> (Verrucomicrobiae)                                   | 2.21   |
| <i>Akkermansia</i> (Verrucomicrobiae)                                   | 2.11   | <i>Bacteroidales**</i> (Bacteroidia)                                    | 2.19   |
| <i>Parasutterella</i> (Gammaproteobacteria)                             | 1.62   | <i>Oscillospiraceae*</i> (Clostridia)                                   | 1.50   |
| <i>Lachnospiraceae_NK4A136_group</i> (Clostridia)                       | 1.39   | <i>Clostridia_UCG-014</i> (Clostridia)                                  | 1.48   |
| <i>Burkholderia-Caballeronia-Paraburkholderia</i> (Gammaproteobacteria) | 1.28   | <i>Parasutterella</i> (Gammaproteobacteria)                             | 1.44   |
| <i>Desulfovibrio</i> (Desulfovibrionia)                                 | 1.22   | <i>Lachnospiraceae_NK4A136_group</i> (Clostridia)                       | 1.30   |
| <i>Clostridia_UCG-014</i> (Clostridia)                                  | 1.15   | <i>Enterococcus</i> (Bacilli)                                           | 1.19   |
| <i>Oscillibacter</i> (Clostridia)                                       | 0.84   | <i>Bacillus</i> (Bacilli)                                               | 1.00   |
| <i>Allistipes</i> (Bacteroidia)                                         | 0.81   | <i>Desulfovibrio</i> (Desulfovibrionia)                                 | 1.00   |
| <i>Colidextribacter</i> (Clostridia)                                    | 0.66   | <i>Burkholderia-Caballeronia-Paraburkholderia</i> (Gammaproteobacteria) | 0.88   |
| <i>Helicobacter</i> (Campylobacteria)                                   | 0.61   | <i>Oscillibacter</i> (Clostridia)                                       | 0.74   |
| <i>Blautia</i> (Clostridia)                                             | 0.52   | <i>Enhydrobacter</i> (Gammaproteobacteria)                              | 0.67   |
| others                                                                  | 10.09  | others                                                                  | 16.39  |
| Total Sum                                                               | 100.00 | Total Sum                                                               | 100.00 |

  

| <i>Pseudobagrus fulvidraco</i> APW                                      | %      | <i>Pseudobagrus fulvidraco</i> Rif                                      | %      |
|-------------------------------------------------------------------------|--------|-------------------------------------------------------------------------|--------|
| <i>Muribaculaceae</i> (Bacteroidia)                                     | 17.75  | <i>Muribaculaceae</i> (Bacteroidia)                                     | 19.09  |
| <i>Lactobacillus</i> (Bacilli)                                          | 9.98   | <i>Lactobacillus</i> (Bacilli)                                          | 13.17  |
| <i>Muribaculaceae*</i> (Bacteroidia)                                    | 9.78   | <i>Muribaculaceae*</i> (Bacteroidia)                                    | 11.08  |
| <i>Muribaculum</i> (Bacteroidia)                                        | 8.68   | <i>Muribaculum</i> (Bacteroidia)                                        | 10.12  |
| <i>Lachnospiraceae*</i> (Clostridia)                                    | 7.55   | <i>Lachnospiraceae*</i> (Clostridia)                                    | 9.08   |
| <i>Elizabethkingia</i> (Bacteroidia)                                    | 4.61   | <i>Campylobacter</i> (Campylobacteria)                                  | 4.46   |
| <i>Campylobacter</i> (Campylobacteria)                                  | 4.24   | <i>Bacteroides</i> (Bacteroidia)                                        | 3.76   |
| <i>Bacteroides</i> (Bacteroidia)                                        | 2.77   | <i>Akkermansia</i> (Verrucomicrobiae)                                   | 2.59   |
| unclassified (Gammaproteobacteria)                                      | 2.71   | <i>Bacteroidales**</i> (Bacteroidia)                                    | 2.27   |
| <i>Niveispirillum</i> (Alphaproteobacteria)                             | 2.56   | <i>Parasutterella</i> (Gammaproteobacteria)                             | 1.82   |
| <i>Akkermansia</i> (Verrucomicrobiae)                                   | 2.28   | <i>Oscillospiraceae*</i> (Clostridia)                                   | 1.59   |
| <i>Bacteroidales**</i> (Bacteroidia)                                    | 2.16   | <i>Clostridia_UCG-014</i> (Clostridia)                                  | 1.57   |
| unclassified (Verrucomicrobiae)                                         | 2.15   | <i>Lachnospiraceae_NK4A136_group</i> (Clostridia)                       | 1.38   |
| <i>Oscillospiraceae*</i> (Clostridia)                                   | 1.73   | <i>Burkholderia-Caballeronia-Paraburkholderia</i> (Gammaproteobacteria) | 1.09   |
| <i>Parasutterella</i> (Gammaproteobacteria)                             | 1.40   | unclassified (Gammaproteobacteria)                                      | 0.96   |
| <i>Clostridia_UCG-014</i> (Clostridia)                                  | 1.33   | <i>Enterobacterales**</i> (Gammaproteobacteria)                         | 0.95   |
| <i>Lachnospiraceae_NK4A136_group</i> (Clostridia)                       | 1.26   | <i>Helicobacter</i> (Campylobacteria)                                   | 0.89   |
| <i>Desulfovibrio</i> (Desulfovibrionia)                                 | 0.98   | <i>Desulfovibrio</i> (Desulfovibrionia)                                 | 0.80   |
| <i>Comamonadaceae*</i> (Gammaproteobacteria)                            | 0.85   | <i>Allistipes</i> (Bacteroidia)                                         | 0.75   |
| <i>Burkholderia-Caballeronia-Paraburkholderia</i> (Gammaproteobacteria) | 0.82   | <i>Oscillibacter</i> (Clostridia)                                       | 0.69   |
| others                                                                  | 14.42  | others                                                                  | 11.89  |
| Total Sum                                                               | 100.00 | Total Sum                                                               | 100.00 |

B

| Genus name                                            | percentage | log2FoldChange | padj                     |
|-------------------------------------------------------|------------|----------------|--------------------------|
| <i>Aphyocypris chinensis</i> APW                      |            |                |                          |
| <i>Chryseobacterium</i> (Bacteroidia)                 | 0.35%      | -6.13          | 8.08 × 10 <sup>-4</sup>  |
| <i>RF39</i> (Bacilli)                                 | 0.12%      | -3.03          | 9.79 × 10 <sup>-2</sup>  |
| <i>ASF356</i> (Clostridia)                            | 0.04%      | -5.09          | 4.79 × 10 <sup>-2</sup>  |
| <i>Moraxellaceae*</i> (Gammaproteobacteria)           | 0.04%      | -5.05          | 5.23 × 10 <sup>-2</sup>  |
| <i>Comamonas</i> (Gammaproteobacteria)                | 0.03%      | -4.44          | 9.79 × 10 <sup>-2</sup>  |
| <i>Aphyocypris chinensis</i> Rif                      |            |                |                          |
| unclassified (Gammaproteobacteria)                    | 2.96%      | 3.81           | 1.39 × 10 <sup>-11</sup> |
| <i>Bacillus</i> (Bacilli)                             | 1.00%      | 6.02           | 5.95 × 10 <sup>-2</sup>  |
| <i>Cetobacterium</i> (Fusobacteriia)                  | 0.18%      | 6.90           | 8.58 × 10 <sup>-3</sup>  |
| <i>Sphingomonas</i> (Alphaproteobacteria)             | 0.03%      | 4.76           | 6.49 × 10 <sup>-2</sup>  |
| <i>Intestinimonas</i> (Clostridia)                    | 0.03%      | 4.86           | 9.79 × 10 <sup>-2</sup>  |
| <i>Pseudobagrus fulvidraco</i> APW                    |            |                |                          |
| <i>Elizabethkingia</i> (Bacteroidia)                  | 4.61%      | -12.33         | 2.06 × 10 <sup>-12</sup> |
| <i>Niveispirillum</i> (Alphaproteobacteria)           | 2.56%      | -11.16         | 8.62 × 10 <sup>-15</sup> |
| unclassified (Verrucomicrobiae)                       | 2.15%      | -11.00         | 1.46 × 10 <sup>-14</sup> |
| <i>Shewanella</i> (Gammaproteobacteria)               | 0.37%      | -5.89          | 2.55 × 10 <sup>-5</sup>  |
| <i>Stella</i> (Alphaproteobacteria)                   | 0.37%      | -8.43          | 7.00 × 10 <sup>-8</sup>  |
| <i>Fimbrimonadaceae*</i> (Fimbrimonadida)             | 0.20%      | -4.56          | 7.55 × 10 <sup>-4</sup>  |
| <i>Fluviicola</i> (Bacteroidia)                       | 0.14%      | -7.02          | 1.13 × 10 <sup>-5</sup>  |
| <i>Arsenicibacter</i> (Bacteroidia)                   | 0.13%      | -6.90          | 8.01 × 10 <sup>-6</sup>  |
| <i>Cloacibacterium</i> (Bacteroidia)                  | 0.12%      | -6.93          | 4.93 × 10 <sup>-4</sup>  |
| <i>Crenobacter</i> (Gammaproteobacteria)              | 0.11%      | -6.66          | 1.13 × 10 <sup>-5</sup>  |
| <i>Enhydrobacter</i> (Gammaproteobacteria)            | 0.11%      | -4.77          | 1.97 × 10 <sup>-2</sup>  |
| <i>Cerasicoccus</i> (Verrucomicrobiae)                | 0.06%      | -5.84          | 6.32 × 10 <sup>-4</sup>  |
| <i>OM190</i> (Planctomycetota***)                     | 0.06%      | -3.44          | 8.98 × 10 <sup>-2</sup>  |
| <i>Sphingopyxis</i> (Alphaproteobacteria)             | 0.03%      | -5.14          | 2.49 × 10 <sup>-3</sup>  |
| <i>pirellula</i> (Planctomycetes)                     | 0.03%      | -5.01          | 3.98 × 10 <sup>-3</sup>  |
| unclassified (Alphaproteobacteria)                    | 0.03%      | -4.80          | 2.19 × 10 <sup>-2</sup>  |
| <i>Legionella</i> (Gammaproteobacteria)               | 0.02%      | -4.24          | 4.89 × 10 <sup>-2</sup>  |
| <i>Mycobacterium</i> (Actinobacteria)                 | 0.02%      | -4.19          | 7.09 × 10 <sup>-2</sup>  |
| <i>Proteus</i> (Gammaproteobacteria)                  | 0.02%      | -4.56          | 5.46 × 10 <sup>-2</sup>  |
| <i>Candidatus Odysseia</i> (Alphaproteobacteria)      | 0.02%      | -3.96          | 8.98 × 10 <sup>-2</sup>  |
| <i>Candidatus Branchiomonas</i> (Gammaproteobacteria) | 0.02%      | -4.14          | 7.17 × 10 <sup>-2</sup>  |
| <i>Candidatus simlichlamydia</i> (Chlamydiae)         | 0.02%      | -4.19          | 5.57 × 10 <sup>-2</sup>  |
| <i>methylothera</i> (Gammaproteobacteria)             | 0.02%      | -4.62          | 2.85 × 10 <sup>-2</sup>  |
| <i>Noviherbaspirillum</i> (Gammaproteobacteria)       | 0.02%      | -4.19          | 2.85 × 10 <sup>-2</sup>  |
| <i>CCM19a</i> (Gammaproteobacteria)                   | 0.02%      | -4.29          | 6.54 × 10 <sup>-2</sup>  |
| <i>Intestinimonas</i> (Clostridia)                    | 0.02%      | -4.08          | 5.57 × 10 <sup>-2</sup>  |
| <i>Dyadobacter</i> (Bacteroidia)                      | 0.02%      | -4.52          | 3.57 × 10 <sup>-2</sup>  |
| <i>Weeksellaceae*</i> (Bacteroidia)                   | 0.02%      | -4.29          | 6.54 × 10 <sup>-2</sup>  |
| <i>Geothermophilum</i> (Bacilli)                      | 0.02%      | -4.16          | 7.17 × 10 <sup>-2</sup>  |
| <i>Planococcaceae*</i> (Bacilli)                      | 0.02%      | -4.32          | 6.54 × 10 <sup>-2</sup>  |
| <i>Vogesella</i> (Gammaproteobacteria)                | 0.02%      | -4.29          | 6.54 × 10 <sup>-2</sup>  |
| <i>Fusobacterium</i> (Fusobacteriia)                  | 0.01%      | -3.84          | 7.04 × 10 <sup>-2</sup>  |
| <i>Empedobacter</i> (Bacteroidia)                     | 0.01%      | -3.69          | 6.35 × 10 <sup>-2</sup>  |
| <i>Nitrosomonas</i> (Gammaproteobacteria)             | 0.01%      | -3.90          | 9.67 × 10 <sup>-2</sup>  |
| <i>Pseudobagrus fulvidraco</i> Rif                    |            |                |                          |
| <i>Pseudoxanthomonas</i> (Gammaproteobacteria)        | 0.12%      | 3.54           | 0.05                     |
| <i>Chitinophagaceae*</i> (Bacteroidia)                | 0.06%      | 3.75           | 0.03                     |
| <i>Enterococcus</i> (Bacilli)                         | 0.04%      | 3.84           | 0.05                     |
| unclassified (Firmicutes***)                          | 0.04%      | 5.01           | 0.02                     |
| <i>Enterococcus</i> (Bacilli)                         | 0.04%      | 3.84           | 0.05                     |
| <i>UCG-003</i> (Clostridia)                           | 0.03%      | 4.57           | 0.03                     |
| <i>Barnesiellaceae*</i> (Bacteroidia)                 | 0.03%      | 4.62           | 0.05                     |
| <i>Faecalibacterium</i> (Clostridia)                  | 0.02%      | 4.39           | 0.04                     |
| <i>Gordoniabacter</i> (Coriobacteriia)                | 0.02%      | 3.88           | 0.07                     |
| <i>UCS-1-2E3</i> (Clostridia)                         | 0.02%      | 3.78           | 0.07                     |
| <i>Bosea</i> (Alphaproteobacteria)                    | 0.01%      | 3.78           | 0.06                     |

Figure S3. Microbiome abundance in each group.

(A) The top 20 taxonomic diversity and relative abundance in Figure 3. Genus (class) is

shown and if the genus level is not identifiable, an additional level is included. \* family,

\*\*order. (B) Relative abundance of bacteria shown in Figure 4 at the genus (class) level.
